# Supplementary material for: Subretinal Glial Membranes in Eyes With Geographic Atrophy
Source: PubMed Central journal article supplement — Invest Ophthalmol Vis Sci. 2017 Mar;58(3):1352–67. doi: 10.1167/iovs.16-21229 (PMC5358932; doi:10.1167/iovs.16-21229), 2017-03
Supplement: iovs-58-02-55_s01.pdf [file iovs-58-02-55_s01.pdf]

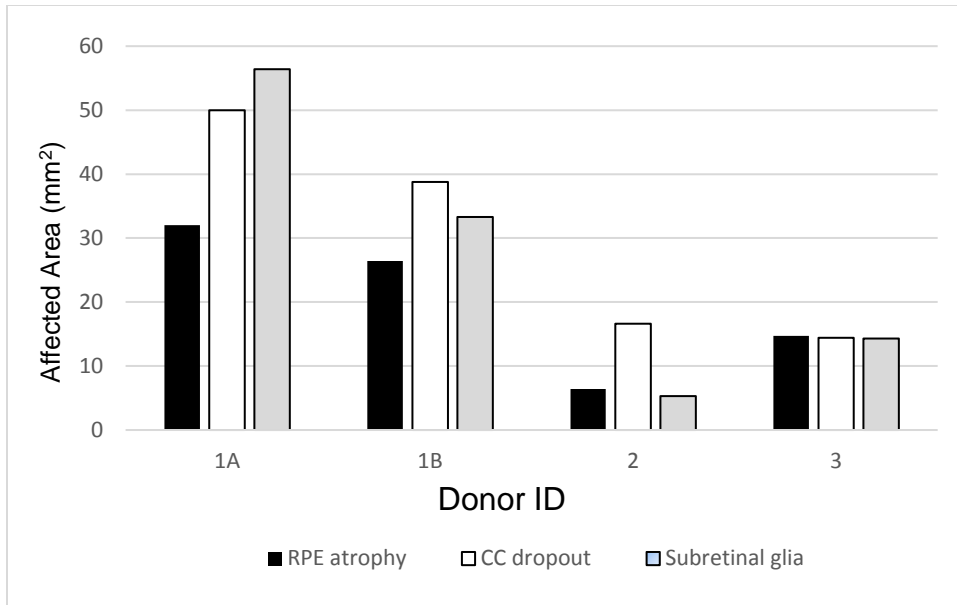

**Supplemental Figure 1. Areas of RPE atrophy, CC dropout and subretinal glia are significantly correlated.** The area of RPE atrophy, CC dropout and subretinal glia are shown for each eye analyzed in the flat perspective. It is important to note that the RPE atrophy is measured in a concave eyecup rather than flattened tissue, which may account for some variability. The correlation coefficient between RPE atrophy and subretinal glia was 0.97 while that for CC dropout and subretinal glia was 0.96.
